# Supplementary material for: Insulin resistance of protein anabolism accompanies that of glucose metabolism in lean, glucose-tolerant offspring of persons with type 2 diabetes
Source: PubMed Central journal article supplement — BMJ Open Diabetes Res Care. 2016 Nov 29;4(1):e000312. doi: 10.1136/bmjdrc-2016-000312 (PMC5129107; doi:10.1136/bmjdrc-2016-000312), 2016-11-29
Supplement: bmjdrc-2016-000312supp_table.pdf [file bmjdrc-2016-000312supp_table.pdf]

**Supplemental Table 1.** Postabsorptive and clamp individual plasma amino acids

| <b>μmol/L</b>           | <b>C</b>       |          | <b>T2D-O</b>   |          | <b>P</b> |       |     |
|-------------------------|----------------|----------|----------------|----------|----------|-------|-----|
|                         | Postabsorptive | Clamp    | Postabsorptive | Clamp    | Clamp    | Group | CxG |
| <b>Essential AA</b>     |                |          |                |          |          |       |     |
| Histidine (His)         | 70 ± 2         | 91 ± 3   | 78 ± 4         | 99 ± 8   | <0.001   | ---   | --- |
| Isoleucine (Ile)        | 46 ± 2         | 48 ± 2   | 54 ± 3         | 54 ± 5   | ---      | ---   | --- |
| Leucine (Leu)           | 103 ± 3        | 106 ± 2  | 121 ± 6*       | 116 ± 11 | ---      | ---   | --- |
| Lysine (Lys)            | 85 ± 11        | 104 ± 10 | 131 ± 27       | 148 ± 36 | 0.014    | ---   | --- |
| Methionine (Met)        | 18 ± 1         | 22 ± 1   | 20 ± 1         | 24 ± 2   | <0.001   | ---   | --- |
| Phenylalanine (Phe)     | 54 ± 1         | 60 ± 1   | 59 ± 3         | 65 ± 3   | <0.001   | ---   | --- |
| Threonine (Thr)         | 75 ± 5         | 65 ± 4   | 65 ± 4         | 59 ± 3   | <0.001   | ---   | --- |
| Tryptophan (Trp)        | 40 ± 3         | 42 ± 2   | 43 ± 3         | 51 ± 3†  | 0.008    | ---   | --- |
| Valine (Val)            | 179 ± 8        | 162 ± 6  | 197 ± 9        | 177 ± 13 | <0.001   | ---   | --- |
| <b>Non-Essential AA</b> |                |          |                |          |          |       |     |
| Alanine (Ala)           | 181 ± 16       | 237 ± 11 | 176 ± 5        | 236 ± 11 | <0.001   | ---   | --- |
| Arginine (Arg)          | 56 ± 5         | 79 ± 4   | 60 ± 9         | 84 ± 13  | <0.001   | ---   | --- |
| Asparagine (Asn)        | 39 ± 3         | 26 ± 2   | 35 ± 1         | 26 ± 1   | <0.001   | ---   | --- |
| Aspartic acid (Asp)     | 50 ± 5         | 48 ± 5   | 59 ± 6         | 57 ± 5   | ---      | ---   | --- |
| Glutamic acid (Glu)     | 54 ± 5         | 53 ± 5   | 69 ± 6         | 64 ± 4   | ---      | ---   | --- |
| Glutamine (Gln)         | 378 ± 20       | 355 ± 19 | 358 ± 27       | 336 ± 36 | ---      | ---   | --- |
| Glycine (Gly)           | 323 ± 44       | 336 ± 36 | 288 ± 45       | 315 ± 47 | 0.008    | ---   | --- |
| Proline (Pro)           | 169 ± 30       | 163 ± 23 | 131 ± 5        | 137 ± 4  | ---      | ---   | --- |
| Serine (Ser)            | 118 ± 6        | 99 ± 6   | 105 ± 8        | 90 ± 3   | <0.001   | ---   | --- |
| Tyrosine (Tyr)          | 37 ± 1         | 27 ± 1   | 40 ± 3         | 30 ± 2   | <0.001   | ---   | --- |

Data are mean ± SEM; analyses by repeated-measures ANOVA; CxG: Clamp x Group. \*: P = 0.014 vs. C Postabsorptive, by Mann-

Whitney U test; †: P < 0.05 vs. C of the same period, by independent samples t-test.
